# Supplementary material for: Ultrasensitive nuclease activity and inhibition assay using microchip electrophoresis with laser induced fluorescence detection
Source: Royal Society of Chemistry journal article supplement (doi:10.1039/c5ay02831k), 2016-01-01
Supplement: c5ay02831k1.pdf [file c5ay02831k1.pdf]

*Supporting Information for*

**Ultrasensitive nuclease activity and inhibition assay using microchip  
electrophoresis with laser induced fluorescence detection**

Yingfeng Qin, Jingjin Zhao,\* Yong Huang, Shuting Li and Shulin Zhao\*

*Key Laboratory for the Chemistry and Molecular Engineering of Medicinal Resources  
(Ministry of Education of China), Guangxi Normal University, Guilin, 541004, China.*

**Table of contents**

1. Supplementary figures and Table

|                 |    |
|-----------------|----|
| Figure S1 ----- | S2 |
| Figure S2 ----- | S3 |
| Figure S3 ----- | S4 |

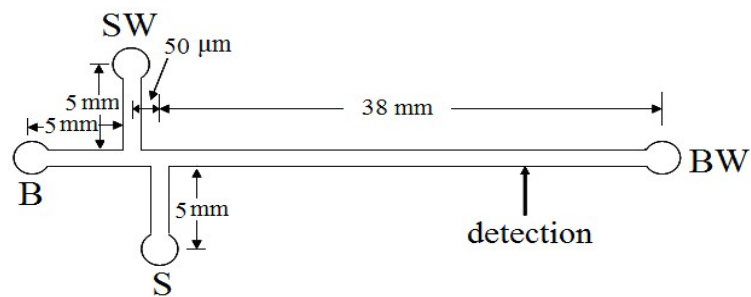

**Fig. S1** The layout and dimensions of the glass/PDMS microchip used in this work. S: sample reservoir; SW: sample waste reservoir; B: buffer reservoir; BW: buffer waste reservoir.

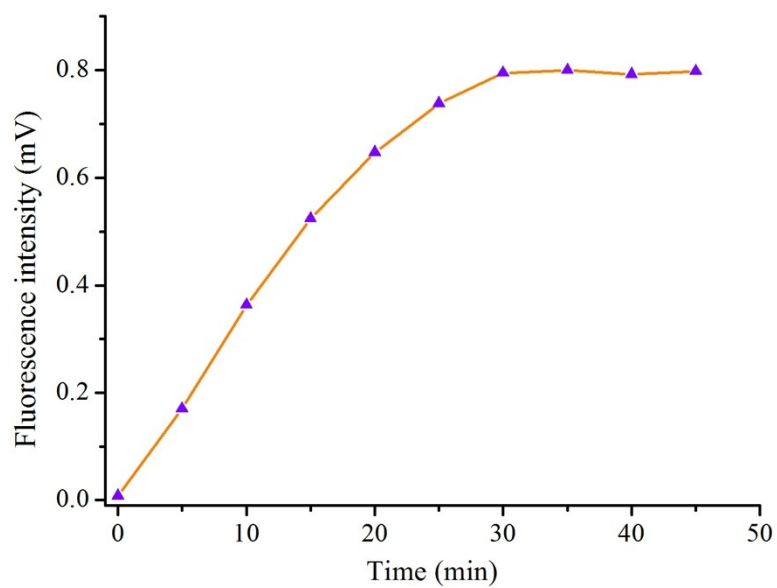

**Fig. S2** Effects of the cleavage reaction time. Electrophoresis buffer was 30 mM borate (pH 9.4) solution containing 30 mM SDS.

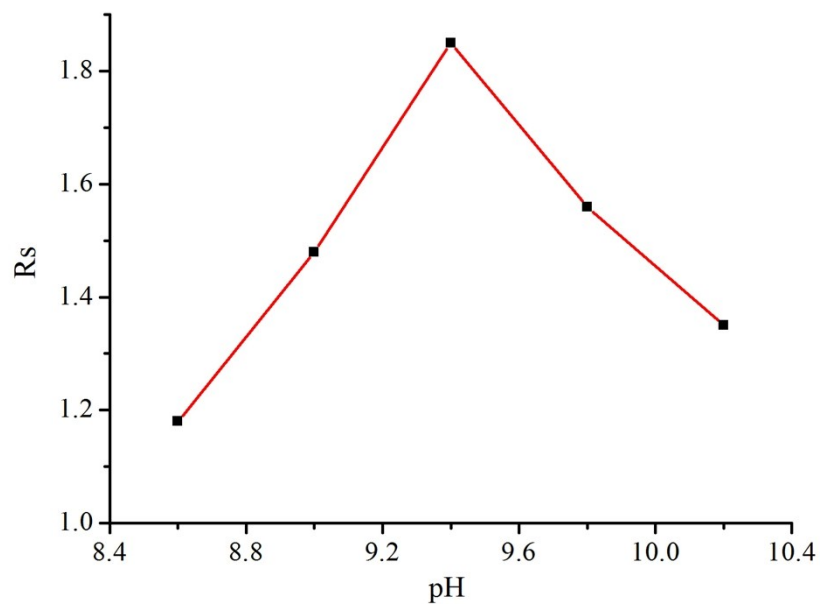

**Fig. S3** Effects of electrophoretic buffer pH on resolution. Electrophoresis buffer was 30 mM borate solution containing 30 mM SDS at different pH values.
